# Supplementary material
Source: ML conference proceedings conference paper supplement (https://openaccess.thecvf.com/content/CVPR_2019/html/Zhang_A_Poisson-Gaussian_Denoising_CVPR_2019_paper.html)
Supplement: Supplementary file 1 [file Zhang_A_Poisson-Gaussian_Denoising_CVPR_2019_supplemental.pdf]

# Supplementary Material for A Poisson-Gaussian Denoising Dataset with Real Fluorescence Microscopy Images

Yide Zhang\*, Yin hao Zhu\*, Evan Nichols, Qingfei Wang, Siyuan Zhang, Cody Smith, Scott Howard  
University of Notre Dame  
Notre Dame, IN 46556, USA

{yzhang34, yzhu10, enichol13, qwang9, szhang8, csmith67, showard}@nd.edu

## 1. Fluorescence microscopy setup

The confocal and two-photon images were acquired with a Nikon A1R-MP laser scanning confocal microscope equipped with a Nikon Apo LWD 40 $\times$ , 1.15 NA water-immersion objective. The confocal and two-photon images were 512 $\times$ 512 pixels with a pixel size of 300 nm and a pixel dwell time of 2  $\mu$ s. The A1R-MP microscope has multiple detectors (PMTs) in parallel, so for multi-channel (color) fluorescence imaging with the BPAE cells, all three images were acquired simultaneously. For confocal imaging, the excitation was generated by a LU4/LU4A laser unit, the pinhole size was set to 1.2 Airy unit, and the imaging conditions for different samples were as follows: BPAE nuclei, 405 nm excitation, 0.5% laser power, 110 PMT gain; BPAE F-actin, 488 nm excitation, 0.5% laser power, 110 PMT gain; BPAE mitochondria, 561 nm excitation, 0.5% laser power, 110 PMT gain; mouse brain, 405 nm excitation, 0.5% laser power, 115 PMT gain; zebrafish embryo, 488 nm excitation, 10% laser power, 140 PMT gain. For two-photon microscopy, the excitation was generated by a Spectra-Physics Mai Tai DeepSee femtosecond laser, and for all two-photon images, the laser power was set to 0.5%, the PMT gain to 130, and the excitation wavelength to 780 nm. Note that our dataset did not include two-photon images of the zebrafish sample because during two-photon imaging, very strong two-photon auto-fluorescence signals from the zebrafish were observed, which severely degraded the imaging quality.

The wide-field images were acquired with a Nikon Eclipse 90i wide-field fluorescence microscope equipped with a Nikon Plan Fluor 40 $\times$ , 0.75 NA objective. The excitation was generated by a halogen lamp (with ND16 neutral-density filter) and the images were captured by a DS-Fi1-U2 camera with an exposure time of 200 ms and a gain of 46. The raw image size was 1280 $\times$ 960 and the pixel size was

170 nm. These images were cropped to 512 $\times$ 512 before being processed for our dataset. Note that our dataset only covered wide-field images of the BPAE cells because wide-field microscopy could not image well in animal tissues such as mouse brain and zebrafish embryo, where strong out-of-focus fluorescence would blur out the wide-field images. Since the BPAE cells were stained with three different fluorophores while only one detector (CCD camera) was available in the 90i microscope, we imaged three times for the same FOV, each time with a different filter block (DAPI for nuclei, FITC for F-actin, TRITC for mitochondria), to acquire the multi-channel (color) fluorescence image of the cells.

## 2. Pixel clipping or over/under-exposure

In fluorescence microscopy, under-exposure is not an issue due to the high sensitivity and accuracy of microscopy detectors. However, pixel clipping or over-exposure could be inevitable because distinct biological structures with various optical properties could generate extremely bright fluorescence signals, which saturated the detector and caused pixel clipping. We tried to avoid pixel clipping by manually adjusting the detector gain. As a result, at most 0.2% of pixels were clipped in all imaging configurations, as shown in Table 1 (averaged percentages). Consequently, the clipped pixels could introduce bias when we estimated the ground truth by image averaging. Considering the negligible proportion of clipped pixels, our ground truth images maintain an accuracy higher than 99.8%.

## 3. Benchmark results on separate test set

Here we show the benchmark results on the 19-th FOV (which is pre-selected as the test set) for each imaging configuration and each noise level, which contains 50 noise realizations in each case. The results are organized in Table 2 (confocal), 3 (two-photon), and 4 (wide-field). For all test

---

\*Equal contribution.

Table 1. Percentages of clipped pixels to all pixels in the images.

| Mod. | Samples        | Raw (%)  | GT (%)   |
|------|----------------|----------|----------|
| CF   | BPAE (Nuclei)  | 0.002343 | 0        |
| CF   | BPAE (F-actin) | 0.004214 | 0.000629 |
| CF   | BPAE (Mito)    | 0.000013 | 0        |
| CF   | Zebrafish      | 0.186157 | 0.038757 |
| CF   | Mouse Brain    | 0.015899 | 0.000057 |
| TP   | BPAE (Nuclei)  | 0.169477 | 0.001450 |
| TP   | BPAE (F-actin) | 0.006969 | 0.000515 |
| TP   | BPAE (Mito)    | 0.000346 | 0.000172 |
| TP   | Mouse Brain    | 0.151986 | 0.008736 |
| WF   | BPAE (Nuclei)  | 0.123395 | 0.000153 |
| WF   | BPAE (F-actin) | 0.000311 | 0        |
| WF   | BPAE (Mito)    | 0.000037 | 0        |

cases, deep learning based denoising methods almost dominate over traditional methods.

#### 4. Network architecture and training details

**Network** We try our best to maintain the same network structure of DnCNN and Noise2Noise as the original papers. For N2N-BN model, we modify the Noise2Noise model by inserting batch normalization layer after each convolution layer and adding Tanh activation before the network output. For more details, please refer to the official implementations of DnCNN<sup>1</sup> and Noise2Noise<sup>2</sup>.

**Training** Input images are of size  $256 \times 256$ , normalized to the range  $[-0.5, 0.5]$ . Adam optimizer is used with hyperparameters  $\beta_1 = 0.9, \beta_2 = 0.99$ , weight decay 0.0. The learning rate scheduling follows the one cycle policy<sup>3</sup>, with maximum learning rate to be 0.0001, initial learning rate to be 1/10 of the maximum rate, then linearly increasing the learning rate to the maximum within 0.3 of the total epochs, then cosine annealing of the learning rate to 1/10<sup>5</sup> of the maximum learning rate. The model is trained for 400 epochs. All the settings above are the same for both DnCNN and Noise2Noise.

The minibatch size is 16 for both DnCNN and Noise2Noise. We randomly sample 4 noisy images for DnCNN (4 pairs of large noisy images for Noise2Noise) of size  $512 \times 512$  from the training set and crop each large image into 4 non-overlapping patches of size  $256 \times 256$ , thus the mini-batch size is actually 16.

<sup>1</sup><https://github.com/cszn/DnCNN>

<sup>2</sup><https://github.com/NVlabs/noise2noise>

<sup>3</sup>[https://github.com/fastai/fastai/blob/master/fastai/callbacks/one\\_cycle.py](https://github.com/fastai/fastai/blob/master/fastai/callbacks/one_cycle.py)

| Confocal Microscopy |             | Number of raw images for averaging |                       |                       |                       |                       | Time          |
|---------------------|-------------|------------------------------------|-----------------------|-----------------------|-----------------------|-----------------------|---------------|
| Samples             | Methods     | 1                                  | 2                     | 4                     | 8                     | 16                    |               |
| BPAE<br>(Nuclei)    | VST+NLM     | 37.35 / 0.9656                     | 38.20 / 0.9730        | 39.31 / 0.9810        | 41.11 / 0.9862        | 43.68 / 0.9906        | 129.92 s      |
|                     | VST+BM3D    | 38.45 / 0.9732                     | 39.59 / 0.9786        | 40.95 / 0.9853        | 42.37 / 0.9889        | 44.37 / 0.9918        | 5.13 s        |
|                     | VST+KSVD    | 38.15 / 0.9699                     | 39.48 / 0.9773        | 40.92 / 0.9850        | 42.30 / 0.9888        | 44.32 / 0.9919        | 65.90 s       |
|                     | VST+KSVD(D) | 37.77 / 0.9679                     | 39.26 / 0.9762        | 40.82 / 0.9846        | 42.28 / 0.9887        | 44.28 / 0.9918        | 20.25 s       |
|                     | VST+KSVD(G) | 38.07 / 0.9694                     | 39.39 / 0.9767        | 40.87 / 0.9847        | 42.28 / 0.9886        | 44.20 / 0.9917        | 17.11 s       |
|                     | VST+EPLL    | 38.38 / 0.9731                     | 39.47 / 0.9785        | 40.85 / 0.9854        | 42.35 / 0.9891        | 44.42 / 0.9920        | 246.47 s      |
|                     | VST+WNNM    | 38.43 / 0.9734                     | 39.55 / 0.9784        | 40.91 / 0.9851        | 42.28 / 0.9885        | 44.21 / 0.9914        | 417.71 s      |
|                     | PURE-LET    | 37.15 / 0.9583                     | 38.55 / 0.9688        | 40.15 / 0.9795        | 41.55 / 0.9843        | 43.51 / 0.9887        | 2.43 s        |
|                     | DnCNN       | 38.91 / <b>0.9795</b>              | 40.23 / <b>0.9834</b> | <b>41.62 / 0.9872</b> | <b>43.07 / 0.9903</b> | <b>44.97 / 0.9930</b> | <b>2.37 s</b> |
|                     | Noise2Noise | <b>39.13</b> / 0.9771              | <b>40.29</b> / 0.9823 | 41.47 / 0.9858        | 42.73 / 0.9885        | 44.21 / 0.9907        | 2.69 s        |
| BPAE<br>(F-actin)   | VST+NLM     | 32.80 / 0.8419                     | 34.28 / 0.8893        | 35.76 / 0.9237        | 37.37 / 0.9462        | 39.39 / 0.9624        | 134.04 s      |
|                     | VST+BM3D    | 34.07 / 0.8880                     | 35.38 / 0.9168        | 36.74 / 0.9395        | 38.15 / 0.9556        | 39.80 / 0.9675        | 6.42 s        |
|                     | VST+KSVD    | 33.33 / 0.8565                     | 34.81 / 0.8985        | 36.25 / 0.9291        | 37.65 / 0.9484        | 39.17 / 0.9614        | 287.22 s      |
|                     | VST+KSVD(D) | 32.88 / 0.8412                     | 34.49 / 0.8892        | 36.07 / 0.9245        | 37.55 / 0.9460        | 39.11 / 0.9598        | 64.16 s       |
|                     | VST+KSVD(G) | 33.08 / 0.8465                     | 34.62 / 0.8914        | 36.14 / 0.9248        | 37.60 / 0.9457        | 39.17 / 0.9595        | 47.82 s       |
|                     | VST+EPLL    | 34.07 / 0.8892                     | 35.49 / 0.9207        | 36.94 / 0.9441        | 38.48 / 0.9604        | 40.35 / 0.9725        | 317.13 s      |
|                     | VST+WNNM    | 33.94 / 0.8809                     | 35.29 / 0.9126        | 36.59 / 0.9362        | 37.84 / 0.9515        | 39.21 / 0.9621        | 415.91 s      |
|                     | PURE-LET    | 33.50 / 0.8776                     | 34.75 / 0.9066        | 35.98 / 0.9283        | 37.16 / 0.9433        | 38.18 / 0.9505        | 2.66 s        |
|                     | DnCNN       | 34.21 / <b>0.9029</b>              | 35.62 / <b>0.9311</b> | <b>37.07 / 0.9512</b> | <b>38.66 / 0.9665</b> | <b>40.75 / 0.9791</b> | <b>2.39 s</b> |
|                     | Noise2Noise | <b>34.33</b> / 0.9025              | <b>35.63</b> / 0.9289 | 36.92 / 0.9480        | 38.30 / 0.9625        | 39.92 / 0.9736        | 2.58 s        |
| BPAE<br>(Mito)      | VST+NLM     | 35.79 / 0.9279                     | 37.27 / 0.9518        | 38.93 / 0.9673        | 40.89 / 0.9781        | 43.36 / 0.9865        | 130.14 s      |
|                     | VST+BM3D    | 37.43 / 0.9489                     | 38.82 / 0.9632        | 40.27 / 0.9742        | 41.80 / 0.9817        | 43.78 / 0.9879        | 5.92 s        |
|                     | VST+KSVD    | 36.97 / 0.9378                     | 38.49 / 0.9575        | 39.98 / 0.9712        | 41.48 / 0.9798        | 43.33 / 0.9865        | 241.33 s      |
|                     | VST+KSVD(D) | 36.55 / 0.9305                     | 38.25 / 0.9537        | 39.89 / 0.9695        | 41.50 / 0.9792        | 43.42 / 0.9864        | 60.91 s       |
|                     | VST+KSVD(G) | 36.93 / 0.9368                     | 38.59 / 0.9579        | 40.18 / 0.9720        | 41.71 / 0.9806        | 43.59 / 0.9871        | 42.51 s       |
|                     | VST+EPLL    | 37.56 / 0.9515                     | 38.95 / 0.9653        | 40.41 / 0.9757        | 41.94 / 0.9828        | 43.98 / 0.9887        | 312.86 s      |
|                     | VST+WNNM    | 37.46 / 0.9486                     | 38.91 / 0.9638        | 40.34 / 0.9745        | 41.80 / 0.9816        | 43.67 / 0.9875        | 502.87 s      |
|                     | PURE-LET    | 36.87 / 0.9433                     | 38.12 / 0.9568        | 39.47 / 0.9678        | 40.95 / 0.9764        | 42.73 / 0.9834        | 2.70 s        |
|                     | DnCNN       | <b>37.89 / 0.9586</b>              | <b>39.30 / 0.9702</b> | <b>40.68 / 0.9781</b> | <b>42.14 / 0.9841</b> | <b>44.00 / 0.9894</b> | <b>2.38 s</b> |
|                     | Noise2Noise | 37.74 / 0.9549                     | 39.13 / 0.9675        | 40.47 / 0.9756        | 41.78 / 0.9813        | 43.22 / 0.9859        | 2.59 s        |
| Zebrafish<br>Embryo | VST+NLM     | 28.23 / 0.7895                     | 31.47 / 0.8593        | 34.00 / 0.9078        | 35.72 / 0.9328        | 37.58 / 0.9482        | 145.64 s      |
|                     | VST+BM3D    | 32.00 / 0.8854                     | 33.75 / 0.9102        | 35.30 / 0.9301        | 36.78 / 0.9443        | 38.32 / 0.9546        | 6.29 s        |
|                     | VST+KSVD    | 29.04 / 0.8203                     | 32.17 / 0.8740        | 34.58 / 0.9167        | 36.31 / 0.9388        | 37.86 / 0.9519        | 60.01 s       |
|                     | VST+KSVD(D) | 28.87 / 0.8184                     | 31.42 / 0.8647        | 33.97 / 0.9093        | 35.97 / 0.9350        | 37.74 / 0.9504        | 12.54 s       |
|                     | VST+KSVD(G) | 29.03 / 0.8201                     | 31.88 / 0.8701        | 34.34 / 0.9133        | 36.26 / 0.9374        | 38.04 / 0.9520        | 9.93 s        |
|                     | VST+EPLL    | 31.62 / 0.8678                     | 33.66 / 0.9048        | 35.34 / 0.9298        | 36.92 / 0.9460        | 38.61 / 0.9574        | 317.67 s      |
|                     | VST+WNNM    | 30.94 / 0.8654                     | 33.43 / 0.9048        | 35.23 / 0.9284        | 36.74 / 0.9432        | 38.14 / 0.9527        | 615.40 s      |
|                     | PURE-LET    | 30.03 / 0.8019                     | 32.48 / 0.8817        | 33.84 / 0.8960        | 35.65 / 0.9254        | 37.15 / 0.9394        | 2.59 s        |
|                     | DnCNN       | 32.44 / 0.9025                     | 34.16 / 0.9267        | <b>35.75 / 0.9425</b> | <b>37.28 / 0.9548</b> | <b>39.07 / 0.9659</b> | <b>2.44 s</b> |
|                     | Noise2Noise | <b>32.93 / 0.9076</b>              | <b>34.37 / 0.9270</b> | 35.71 / 0.9410        | 37.06 / 0.9523        | 38.65 / 0.9625        | 2.68 s        |
| Mouse<br>Brain      | VST+NLM     | 36.31 / 0.9534                     | 37.53 / 0.9632        | 38.95 / 0.9706        | 40.87 / 0.9763        | 43.37 / 0.9819        | 131.08 s      |
|                     | VST+BM3D    | 37.95 / 0.9637                     | 39.47 / 0.9704        | 41.09 / 0.9765        | 42.73 / 0.9811        | 44.52 / 0.9847        | 6.24 s        |
|                     | VST+KSVD    | 37.46 / 0.9587                     | 39.24 / 0.9684        | 40.94 / 0.9757        | 42.55 / 0.9807        | 44.24 / 0.9846        | 85.33 s       |
|                     | VST+KSVD(D) | 36.67 / 0.9544                     | 38.68 / 0.9659        | 40.63 / 0.9746        | 42.43 / 0.9804        | 44.26 / 0.9846        | 21.95 s       |
|                     | VST+KSVD(G) | 37.30 / 0.9582                     | 39.15 / 0.9681        | 40.93 / 0.9757        | 42.65 / 0.9808        | 44.49 / 0.9849        | 17.89 s       |
|                     | VST+EPLL    | 37.92 / 0.9640                     | 39.50 / 0.9710        | 41.18 / 0.9772        | 42.87 / 0.9818        | 44.73 / 0.9855        | 320.98 s      |
|                     | VST+WNNM    | 37.86 / 0.9624                     | 39.47 / 0.9698        | 41.08 / 0.9761        | 42.62 / 0.9804        | 44.17 / 0.9837        | 456.09 s      |
|                     | PURE-LET    | 36.60 / 0.9359                     | 38.10 / 0.9477        | 40.06 / 0.9650        | 41.75 / 0.9739        | 43.29 / 0.9791        | 2.54 s        |
|                     | DnCNN       | 38.15 / <b>0.9672</b>              | <b>39.78 / 0.9741</b> | <b>41.41 / 0.9794</b> | <b>43.11 / 0.9841</b> | <b>45.20 / 0.9887</b> | <b>2.35 s</b> |
|                     | Noise2Noise | <b>38.19</b> / 0.9665              | 39.77 / 0.9735        | 41.28 / 0.9787        | 42.83 / 0.9831        | 44.56 / 0.9869        | 2.71 s        |

Table 2. Denoising performance of confocal microscopy images (the 19-th FOV of each imaging configuration). PSNR (dB), SSIM, and denoising time (seconds) are obtained by averaging over 50 noise realizations through imaging experiments.

| Two-Photon Microscopy |             | Number of raw images for averaging |                       |                       |                       |                       | Time          |
|-----------------------|-------------|------------------------------------|-----------------------|-----------------------|-----------------------|-----------------------|---------------|
| Samples               | Methods     | 1                                  | 2                     | 4                     | 8                     | 16                    |               |
| BPAE<br>(Nuclei)      | VST+NLM     | 31.34 / 0.9173                     | 32.13 / 0.9286        | 32.95 / 0.9390        | 34.14 / 0.9482        | 37.35 / 0.9571        | 137.27 s      |
|                       | VST+BM3D    | 32.02 / 0.9297                     | 32.70 / 0.9382        | 33.43 / 0.9458        | 34.60 / 0.9526        | 37.77 / 0.9592        | 5.58 s        |
|                       | VST+KSVD    | 31.71 / 0.9227                     | 32.55 / 0.9352        | 33.37 / 0.9453        | 34.55 / 0.9535        | 37.70 / 0.9613        | 42.51 s       |
|                       | VST+KSVD(D) | 31.48 / 0.9195                     | 32.33 / 0.9323        | 33.23 / 0.9438        | 34.48 / 0.9529        | 37.69 / 0.9612        | 10.77 s       |
|                       | VST+KSVD(G) | 31.70 / 0.9225                     | 32.52 / 0.9347        | 33.34 / 0.9448        | 34.55 / 0.9533        | 37.75 / 0.9613        | 8.12 s        |
|                       | VST+EPLL    | 32.00 / 0.9313                     | 32.70 / 0.9404        | 33.48 / 0.9483        | 34.69 / 0.9552        | 37.95 / 0.9618        | 284.32 s      |
|                       | VST+WNNM    | 32.01 / 0.9298                     | 32.68 / 0.9383        | 33.41 / 0.9460        | 34.55 / 0.9524        | 37.62 / 0.9585        | 487.02 s      |
|                       | PURE-LET    | 31.62 / 0.9101                     | 32.27 / 0.9198        | 32.88 / 0.9231        | 33.97 / 0.9312        | 36.92 / 0.9439        | 2.68 s        |
|                       | DnCNN       | 31.59 / 0.9250                     | 32.46 / 0.9421        | 33.38 / <b>0.9513</b> | 34.75 / <b>0.9598</b> | <b>38.30 / 0.9705</b> | <b>2.16</b> s |
|                       | Noise2Noise | <b>32.44 / 0.9354</b>              | <b>33.21 / 0.9434</b> | <b>34.04 / 0.9509</b> | <b>35.19 / 0.9590</b> | 38.22 / 0.9685        | 2.51 s        |
| BPAE<br>(F-actin)     | VST+NLM     | 30.26 / 0.7176                     | 31.43 / 0.7799        | 32.70 / 0.8404        | 34.24 / 0.8912        | 37.04 / 0.9297        | 229.93 s      |
|                       | VST+BM3D    | 31.59 / 0.8037                     | 32.52 / 0.8442        | 33.56 / 0.8813        | 34.91 / 0.9139        | 37.56 / 0.9408        | 5.89 s        |
|                       | VST+KSVD    | 30.67 / 0.7381                     | 31.84 / 0.7992        | 33.10 / 0.8560        | 34.54 / 0.8995        | 37.07 / 0.9304        | 163.48 s      |
|                       | VST+KSVD(D) | 30.43 / 0.7261                     | 31.52 / 0.7833        | 32.83 / 0.8438        | 34.38 / 0.8936        | 37.00 / 0.9279        | 30.14 s       |
|                       | VST+KSVD(G) | 30.57 / 0.7325                     | 31.69 / 0.7904        | 32.97 / 0.8485        | 34.48 / 0.8952        | 37.09 / 0.9284        | 24.08 s       |
|                       | VST+EPLL    | 31.48 / 0.7950                     | 32.56 / 0.8456        | 33.72 / 0.8889        | 35.19 / 0.9237        | 38.09 / 0.9507        | 287.27 s      |
|                       | VST+WNNM    | 31.24 / 0.7778                     | 32.30 / 0.8278        | 33.41 / 0.8723        | 34.76 / 0.9082        | 37.25 / 0.9345        | 506.98 s      |
|                       | PURE-LET    | 31.19 / 0.7858                     | 32.09 / 0.8267        | 33.19 / 0.8705        | 34.53 / 0.9055        | 36.85 / 0.9295        | 2.62 s        |
|                       | DnCNN       | 31.52 / 0.8222                     | 32.67 / 0.8685        | 33.92 / <b>0.9059</b> | 35.47 / <b>0.9368</b> | <b>38.68 / 0.9643</b> | <b>2.10</b> s |
|                       | Noise2Noise | <b>32.00 / 0.8257</b>              | <b>33.10 / 0.8701</b> | <b>34.19 / 0.9048</b> | <b>35.59 / 0.9342</b> | 38.46 / 0.9596        | 2.32 s        |
| BPAE<br>(Mito)        | VST+NLM     | 35.11 / 0.8525                     | 36.73 / 0.8917        | 38.66 / 0.9290        | 40.68 / 0.9554        | 43.49 / 0.9738        | 208.28 s      |
|                       | VST+BM3D    | 37.52 / 0.9130                     | 38.72 / 0.9338        | 40.09 / 0.9511        | 41.62 / 0.9648        | 43.97 / 0.9766        | 5.49 s        |
|                       | VST+KSVD    | 35.75 / 0.8679                     | 37.34 / 0.9039        | 39.21 / 0.9367        | 40.98 / 0.9576        | 43.29 / 0.9725        | 97.25 s       |
|                       | VST+KSVD(D) | 35.61 / 0.8648                     | 36.96 / 0.8961        | 38.77 / 0.9295        | 40.66 / 0.9536        | 43.12 / 0.9710        | 19.32 s       |
|                       | VST+KSVD(G) | 35.74 / 0.8675                     | 37.25 / 0.9019        | 39.16 / 0.9354        | 41.07 / 0.9579        | 43.57 / 0.9737        | 14.39 s       |
|                       | VST+EPLL    | 37.29 / 0.9065                     | 38.81 / 0.9348        | 40.38 / 0.9549        | 42.05 / 0.9689        | 44.58 / 0.9800        | 291.54 s      |
|                       | VST+WNNM    | 36.68 / 0.8929                     | 38.30 / 0.9250        | 39.90 / 0.9481        | 41.51 / 0.9636        | 43.77 / 0.9754        | 525.45 s      |
|                       | PURE-LET    | 36.88 / 0.8946                     | 38.01 / 0.9179        | 38.70 / 0.9276        | 40.12 / 0.9459        | 42.27 / 0.9637        | 2.77 s        |
|                       | DnCNN       | <b>38.15 / 0.9251</b>              | <b>39.46 / 0.9460</b> | <b>40.87 / 0.9616</b> | <b>42.51 / 0.9738</b> | <b>45.32 / 0.9845</b> | <b>2.10</b> s |
|                       | Noise2Noise | 38.11 / 0.9241                     | 39.38 / 0.9450        | 40.77 / 0.9606        | 42.37 / 0.9727        | 44.82 / 0.9825        | 2.33 s        |
| Mouse<br>Brain        | VST+NLM     | 32.80 / 0.9134                     | 33.88 / 0.9237        | 34.88 / 0.9317        | 36.31 / 0.9384        | 38.96 / 0.9449        | 211.65 s      |
|                       | VST+BM3D    | 33.81 / 0.9246                     | 34.78 / 0.9317        | 35.77 / 0.9379        | 36.97 / 0.9431        | 39.39 / 0.9481        | 6.14 s        |
|                       | VST+KSVD    | 33.35 / 0.9183                     | 34.47 / 0.9288        | 35.60 / 0.9374        | 36.85 / 0.9442        | 39.27 / 0.9509        | 79.00 s       |
|                       | VST+KSVD(D) | 32.89 / 0.9147                     | 34.14 / 0.9264        | 35.43 / 0.9362        | 36.79 / 0.9437        | 39.26 / 0.9507        | 13.64 s       |
|                       | VST+KSVD(G) | 33.34 / 0.9179                     | 34.50 / 0.9285        | 35.66 / 0.9372        | 36.94 / 0.9441        | 39.42 / 0.9508        | 9.83 s        |
|                       | VST+EPLL    | 33.86 / <b>0.9262</b>              | 34.86 / <b>0.9339</b> | 35.86 / 0.9403        | 37.11 / 0.9456        | 39.61 / 0.9506        | 286.50 s      |
|                       | VST+WNNM    | 33.79 / 0.9254                     | 34.75 / 0.9323        | 35.74 / 0.9386        | 36.91 / 0.9435        | 39.22 / 0.9480        | 512.61 s      |
|                       | PURE-LET    | 32.86 / 0.8812                     | 33.47 / 0.8720        | 34.42 / 0.8769        | 35.49 / 0.8878        | 37.40 / 0.8997        | 2.84 s        |
|                       | DnCNN       | 33.67 / 0.9068                     | 34.95 / 0.9290        | 36.10 / <b>0.9413</b> | 37.43 / <b>0.9507</b> | <b>40.30 / 0.9630</b> | <b>2.30</b> s |
|                       | Noise2Noise | <b>34.33 / 0.9249</b>              | <b>35.32 / 0.9335</b> | <b>36.25 / 0.9410</b> | <b>37.46 / 0.9499</b> | 39.89 / 0.9609        | 2.63 s        |

Table 3. Denoising performance of two-photon microscopy images (the 19-th FOV of each imaging configuration). PSNR (dB), SSIM, and denoising time (seconds) are obtained by averaging over 50 noise realizations through imaging experiments.

| <b>Wide-Field Microscopy</b> |             | Number of raw images for averaging |                       |                       |                       |                       | Time          |
|------------------------------|-------------|------------------------------------|-----------------------|-----------------------|-----------------------|-----------------------|---------------|
| Samples                      | Methods     | 1                                  | 2                     | 4                     | 8                     | 16                    |               |
| BPAE<br>(Nuclei)             | VST+NLM     | 25.53 / 0.3875                     | 28.49 / 0.5548        | 31.36 / 0.7122        | 34.33 / 0.8397        | 37.74 / 0.9264        | 138.54 s      |
|                              | VST+BM3D    | 26.22 / 0.4339                     | 29.16 / 0.6020        | 31.99 / 0.7511        | 34.91 / 0.8650        | 38.25 / 0.9386        | 6.13 s        |
|                              | VST+KSVD    | 26.38 / 0.4459                     | 29.31 / 0.6132        | 32.10 / 0.7577        | 34.99 / 0.8681        | 38.30 / 0.9397        | 1348.61 s     |
|                              | VST+KSVD(D) | 26.41 / 0.4489                     | 29.33 / 0.6152        | 32.11 / 0.7590        | 35.00 / 0.8688        | 38.30 / 0.9398        | 183.82 s      |
|                              | VST+KSVD(G) | 26.40 / 0.4533                     | 29.32 / 0.6182        | 32.10 / 0.7604        | 34.98 / 0.8693        | 38.28 / 0.9399        | 170.94 s      |
|                              | VST+EPLL    | 26.06 / 0.4244                     | 29.00 / 0.5923        | 31.86 / 0.7440        | 34.79 / 0.8601        | 38.15 / 0.9365        | 354.13 s      |
|                              | VST+WNNM    | 26.36 / 0.4440                     | 29.29 / 0.6116        | 32.11 / 0.7581        | 35.01 / 0.8690        | 38.32 / 0.9402        | 420.74 s      |
|                              | PURE-LET    | 26.13 / 0.4258                     | 29.05 / 0.5931        | 31.89 / 0.7442        | 34.79 / 0.8593        | 38.07 / 0.9341        | 2.49 s        |
|                              | DnCNN       | 33.43 / 0.8898                     | 35.56 / 0.9262        | 37.05 / 0.9437        | 38.40 / 0.9548        | 40.12 / 0.9651        | <b>2.48 s</b> |
|                              | Noise2Noise | <b>36.26 / 0.9409</b>              | <b>37.12 / 0.9462</b> | <b>37.88 / 0.9508</b> | <b>38.80 / 0.9569</b> | <b>40.33 / 0.9660</b> | 2.64 s        |
| BPAE<br>(F-actin)            | VST+NLM     | 23.93 / 0.3370                     | 27.02 / 0.4988        | 30.21 / 0.6672        | 33.58 / 0.8096        | 37.67 / 0.9150        | 132.00 s      |
|                              | VST+BM3D    | 24.72 / 0.3792                     | 27.84 / 0.5467        | 31.02 / 0.7084        | 34.36 / 0.8367        | 38.27 / 0.9258        | 5.66 s        |
|                              | VST+KSVD    | 24.94 / 0.3910                     | 28.03 / 0.5575        | 31.22 / 0.7178        | 34.54 / 0.8426        | 38.48 / -0.9292       | 1343.88 s     |
|                              | VST+KSVD(D) | 25.01 / 0.3965                     | 28.11 / 0.5629        | 31.28 / 0.7213        | 34.59 / 0.8445        | 38.51 / 0.9297        | 175.55 s      |
|                              | VST+KSVD(G) | 25.04 / 0.4036                     | 28.13 / 0.5683        | 31.30 / 0.7245        | 34.60 / 0.8458        | 38.50 / 0.9299        | 156.79 s      |
|                              | VST+EPLL    | 24.55 / 0.3711                     | 27.70 / 0.5393        | 30.88 / 0.7018        | 34.24 / 0.8331        | 38.16 / 0.9241        | 352.19 s      |
|                              | VST+WNNM    | 24.94 / 0.3900                     | 28.01 / 0.5560        | 31.17 / 0.7154        | 34.48 / 0.8406        | 38.36 / 0.9272        | 438.09 s      |
|                              | PURE-LET    | 24.67 / 0.3736                     | 27.75 / 0.5393        | 30.90 / 0.7012        | 34.18 / 0.8306        | 37.64 / 0.9134        | 2.49 s        |
|                              | DnCNN       | 32.54 / 0.8050                     | 34.27 / 0.8486        | 35.78 / 0.8817        | 37.47 / 0.9133        | 39.62 / 0.9436        | <b>2.06 s</b> |
|                              | Noise2Noise | <b>33.30 / 0.8264</b>              | <b>34.67 / 0.8590</b> | <b>36.03 / 0.8869</b> | <b>37.65 / 0.9162</b> | <b>39.75 / 0.9452</b> | 2.66 s        |
| BPAE<br>(Mito)               | VST+NLM     | 26.26 / 0.4134                     | 29.35 / 0.5850        | 32.55 / 0.7418        | 35.96 / 0.8610        | 39.93 / 0.9389        | 134.42 s      |
|                              | VST+BM3D    | 26.93 / 0.4611                     | 30.03 / 0.6312        | 33.24 / 0.7778        | 36.65 / 0.8831        | 40.58 / 0.9487        | 5.97 s        |
|                              | VST+KSVD    | 27.11 / 0.4737                     | 30.20 / 0.6417        | 33.38 / 0.7845        | 36.76 / 0.8863        | 40.70 / 0.9504        | 1247.01 s     |
|                              | VST+KSVD(D) | 27.14 / 0.4768                     | 30.22 / 0.6440        | 33.40 / 0.7859        | 36.78 / 0.8869        | 40.69 / 0.9504        | 172.92 s      |
|                              | VST+KSVD(G) | 27.13 / 0.4804                     | 30.22 / 0.6464        | 33.40 / 0.7870        | 36.76 / 0.8872        | 40.66 / 0.9503        | 161.30 s      |
|                              | VST+EPLL    | 26.80 / 0.4524                     | 29.91 / 0.6233        | 33.12 / 0.7721        | 36.51 / 0.8791        | 40.46 / 0.9471        | 345.91 s      |
|                              | VST+WNNM    | 27.08 / 0.4709                     | 30.17 / 0.6400        | 33.37 / 0.7841        | 36.77 / 0.8866        | 40.69 / 0.9502        | 430.37 s      |
|                              | PURE-LET    | 26.85 / 0.4528                     | 29.94 / 0.6231        | 33.13 / 0.7709        | 36.49 / 0.8777        | 40.27 / 0.9440        | 2.56 s        |
|                              | DnCNN       | 34.87 / 0.8965                     | 36.90 / 0.9228        | 38.75 / 0.9405        | 40.65 / 0.9552        | 42.78 / 0.9684        | <b>2.18 s</b> |
|                              | Noise2Noise | <b>35.55 / 0.9105</b>              | <b>37.30 / 0.9288</b> | <b>39.08 / 0.9436</b> | <b>40.88 / 0.9567</b> | <b>42.91 / 0.9692</b> | 2.71 s        |

Table 4. Denoising performance of wide-field microscopy images (the 19-th FOV of each imaging configuration). PSNR (dB), SSIM, and denoising time (seconds) are obtained by averaging over 50 noise realizations through imaging experiments.
